# Supplementary material for: Reactions of nickel boranyl compounds with pnictogen–carbon triple bonds
Source: Royal Society of Chemistry journal article supplement (doi:10.1039/d3ra02797j), 2023-01-01

*Supporting information for:*

---

***Reactions of Nickel Boranyl Compounds with Pnictogen-  
Carbon Triple Bonds***

Brady J. H. Austen, Marissa L. Clapson, and Marcus W. Drover\*

---

\*E-mail: [marcus.drover@uwindsor.ca](mailto:marcus.drover@uwindsor.ca)

Department of Chemistry and Biochemistry, The University of Windsor, 401 Sunset Avenue, Windsor,  
ON, N9B 3P4, Canada

|                                    |            |
|------------------------------------|------------|
| 1. Multinuclear NMR Data           | <b>S2</b>  |
| 2. Catalytic Hydroboration Details | <b>S12</b> |
| 2. Crystallographic Details        | <b>S15</b> |
| 3. Computational Details           | <b>S17</b> |

## Multinuclear NMR Data:

Figure S1. 2,  $^1\text{H}$  NMR,  $\text{tol-d}_8$ , 500 MHz, 298 K.

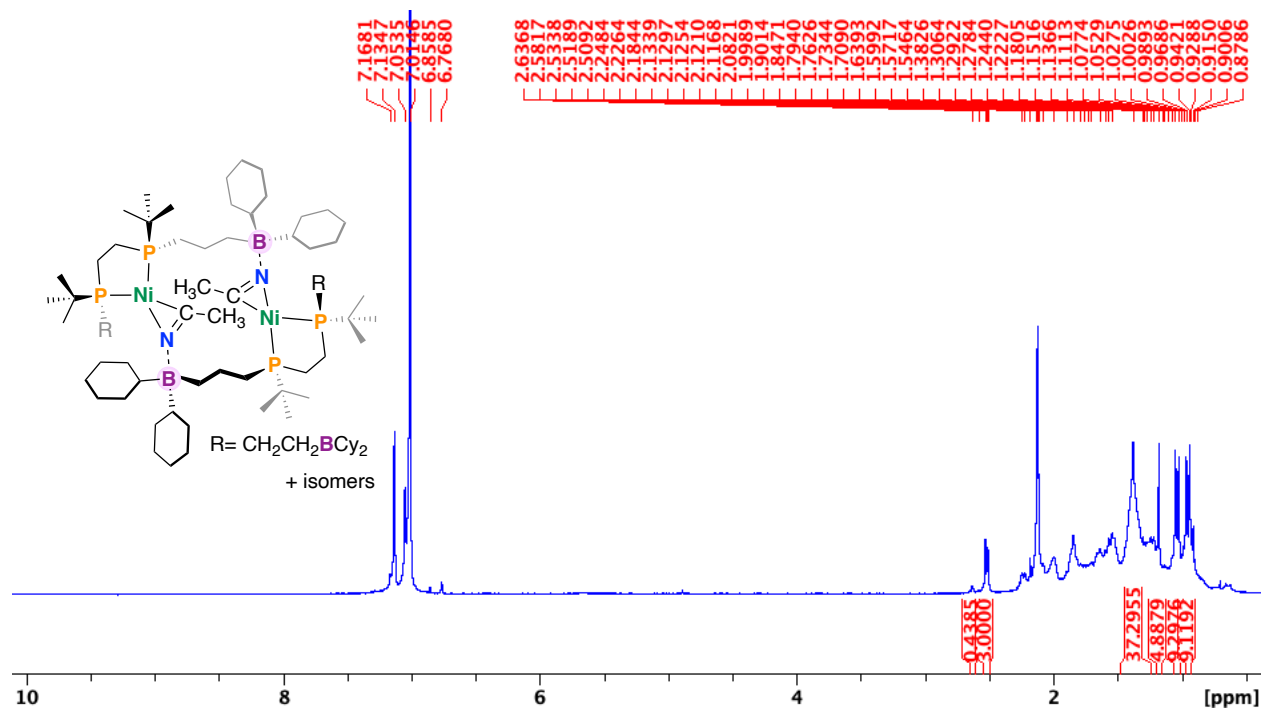

Figure S2. 2,  $^1\text{H}$ - $^1\text{H}\{^{31}\text{P}\}$  NMR Overlay,  $\text{tol-d}_8$ , 500 MHz, 298 K.

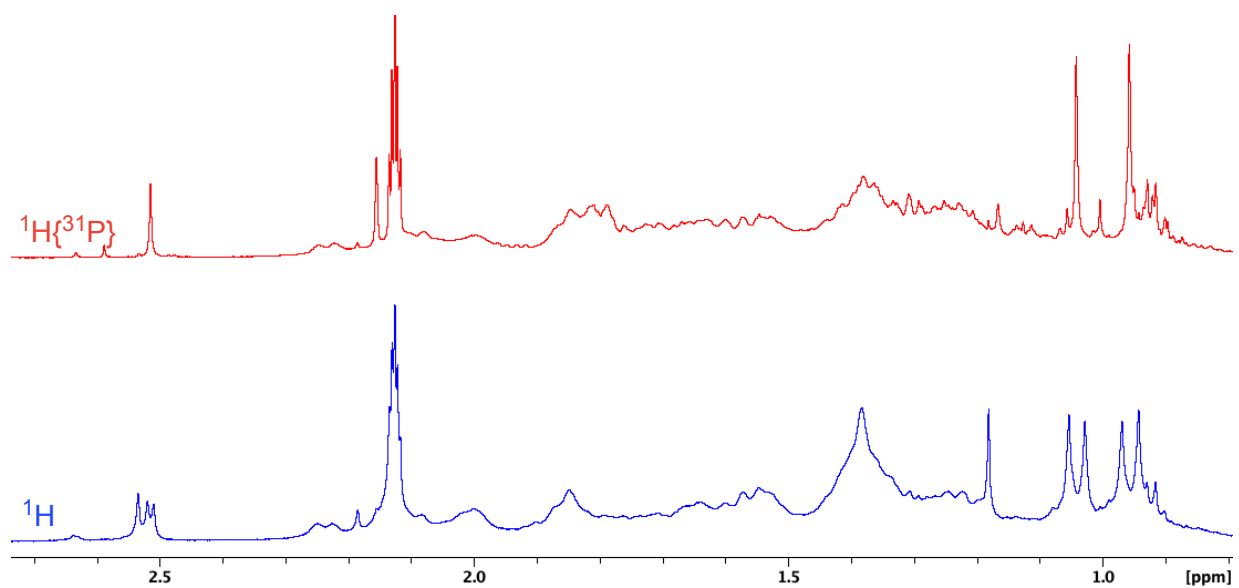

**Figure S3. 2,**  $^{31}\text{P}\{^1\text{H}\}$  NMR,  $\text{tol-d}_8$ , 203 MHz, 298 K.

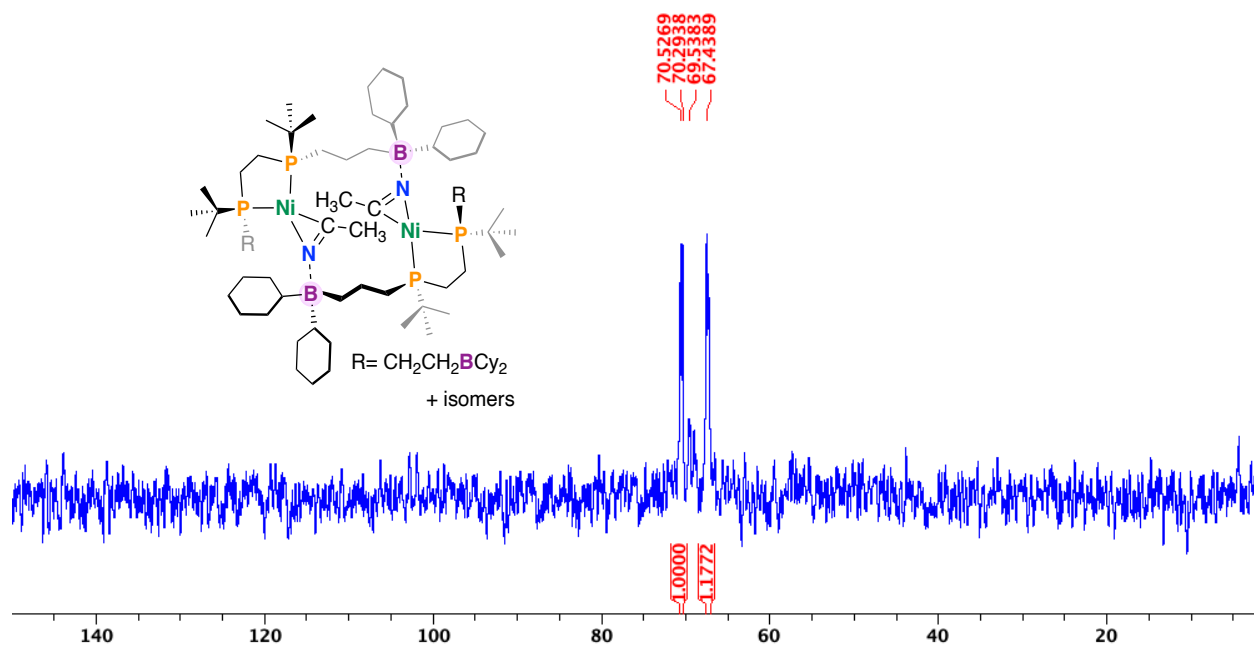

**Figure S4. 2,**  $^{31}\text{P}\{^1\text{H}\}$  NMR expansion,  $\text{tol-d}_8$ , 203 MHz, 298 K.

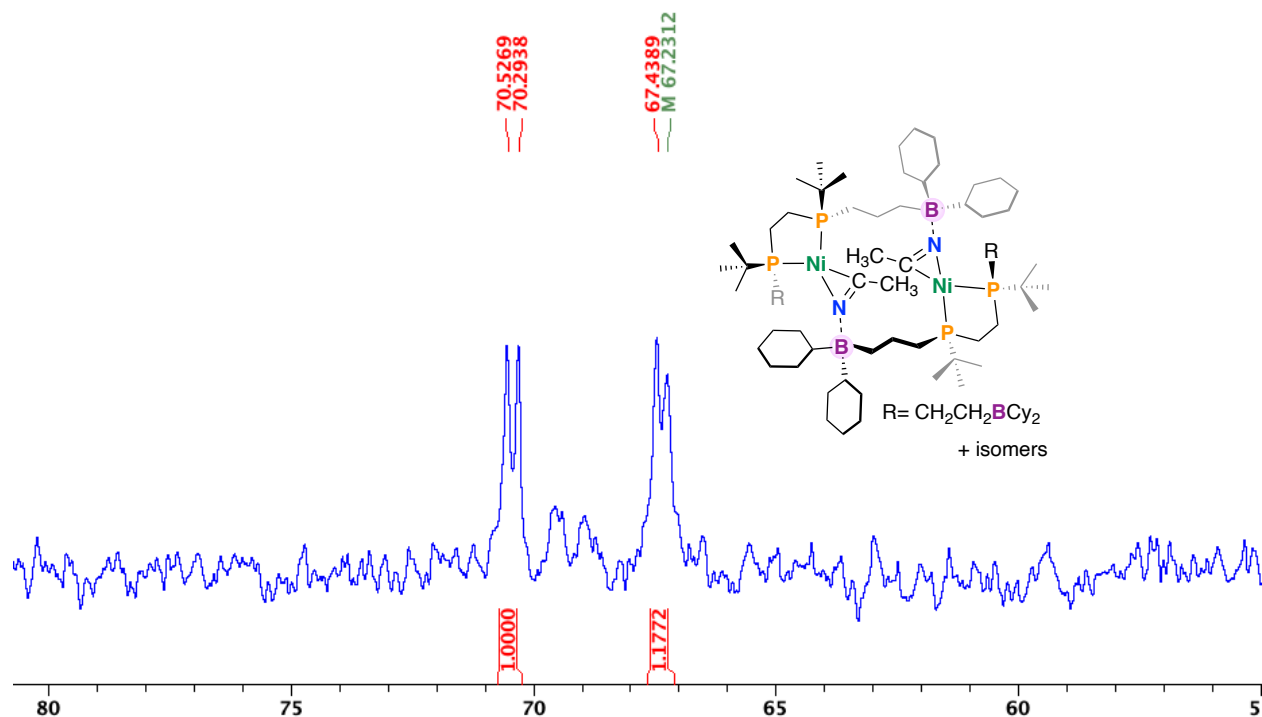

**Figure S5. 2,**  $^{11}\text{B}\{^1\text{H}\}$  NMR,  $\text{tol-d}_8$ , 96.3 MHz, 298 K, Inset collected at 160.5 MHz.

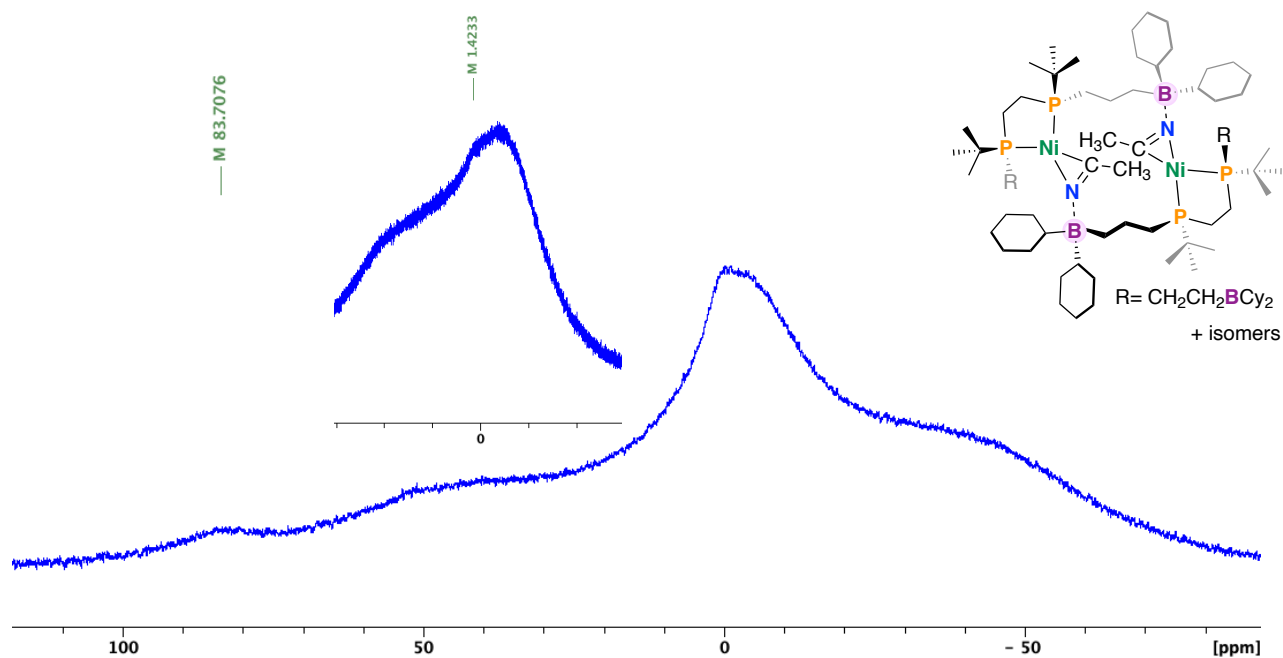

**Figure S6. 2,**  $^{13}\text{C}\{^1\text{H}\}$  NMR,  $\text{tol-d}_8$ , 125 MHz, 298 K.

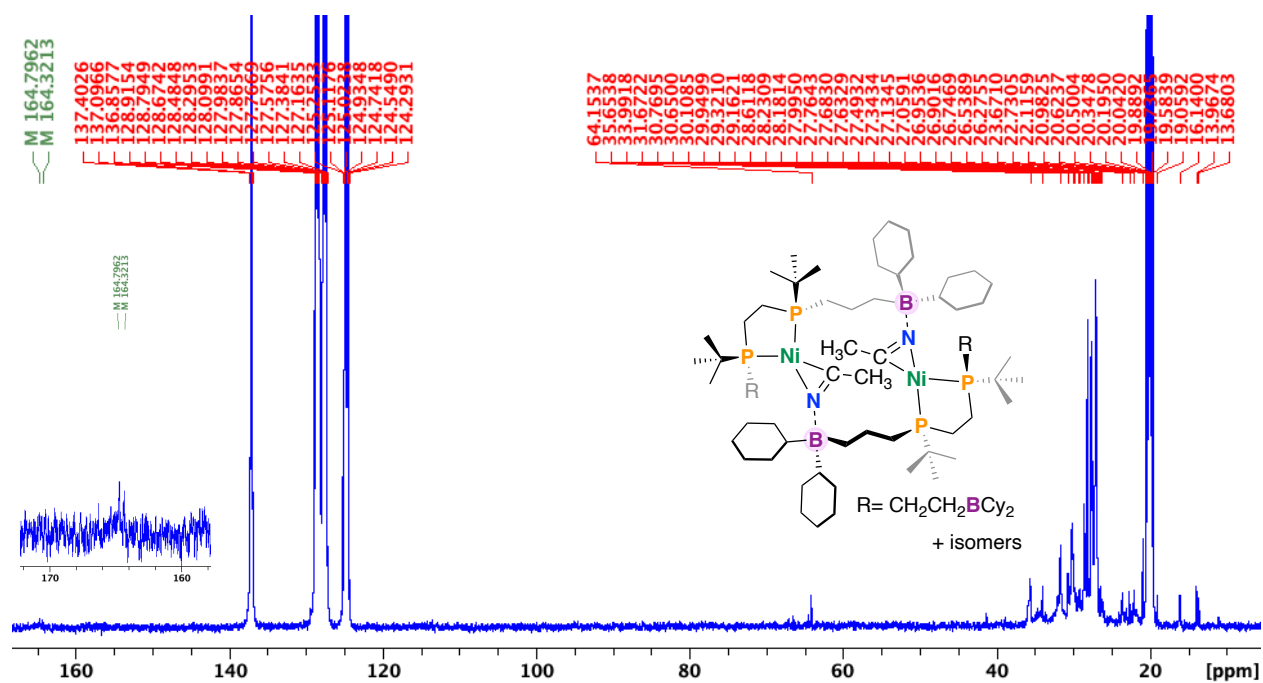

**Figure S7. 2**, IR Overlay of free CH<sub>3</sub>CN and complex **2** comparing  $\nu(\text{CN})$ .

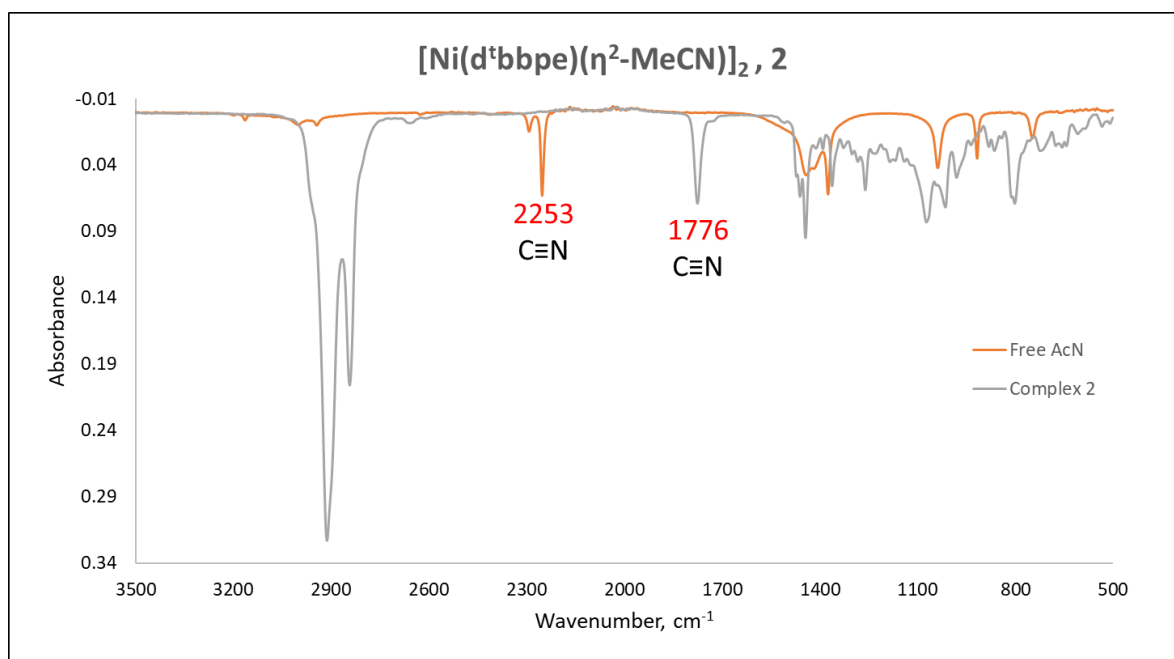

**Figure S8. 3**, <sup>1</sup>H NMR, tol-d<sub>8</sub>, 500 MHz, 298 K.

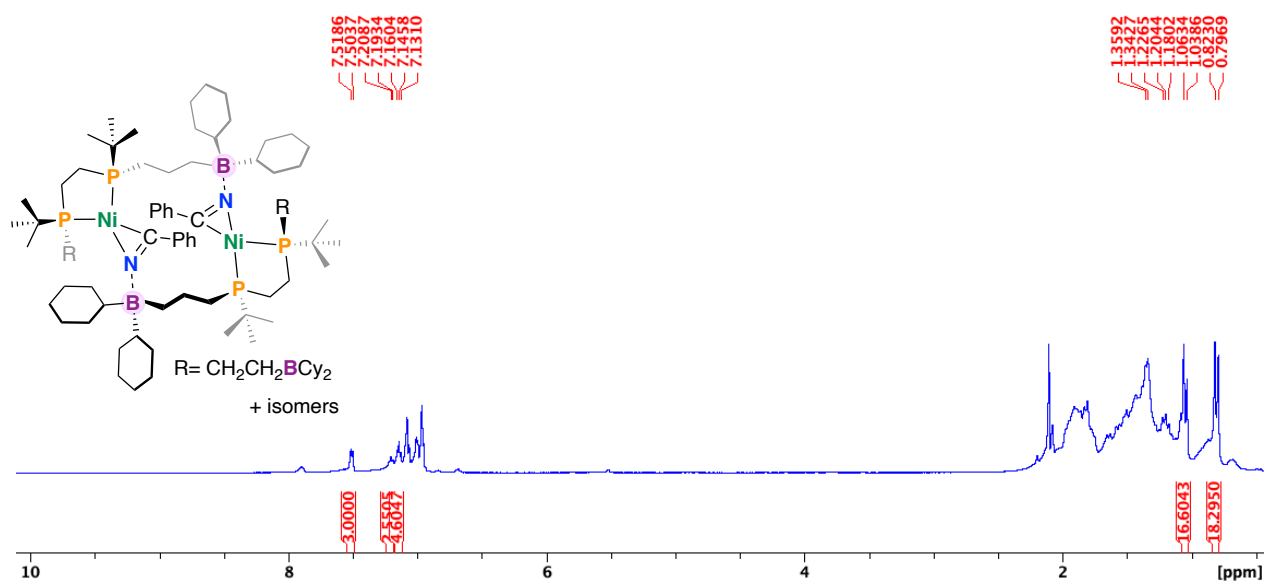

**Figure S9. 3,**  $^{31}\text{P}\{^1\text{H}\}$  NMR,  $\text{tol-d}_8$ , 203 MHz, 298 K.

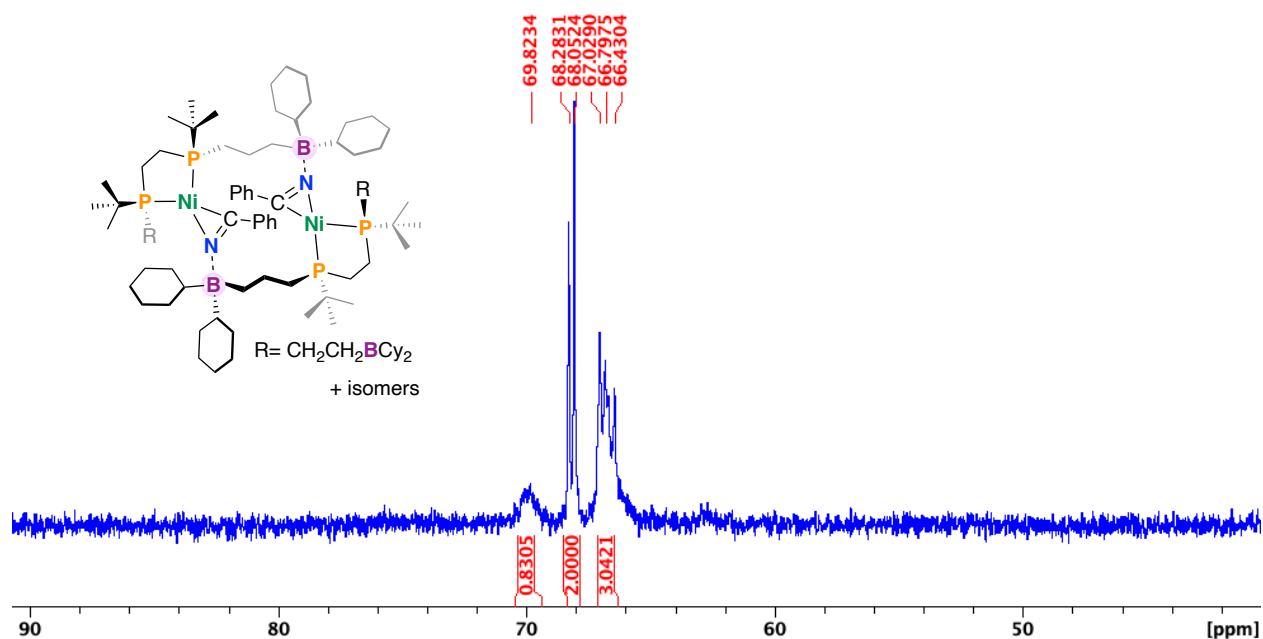

**Figure S10. 3,**  $^{31}\text{P}\{^1\text{H}\}$  NMR Expansion,  $\text{tol-d}_8$ , 203 MHz, 298 K.

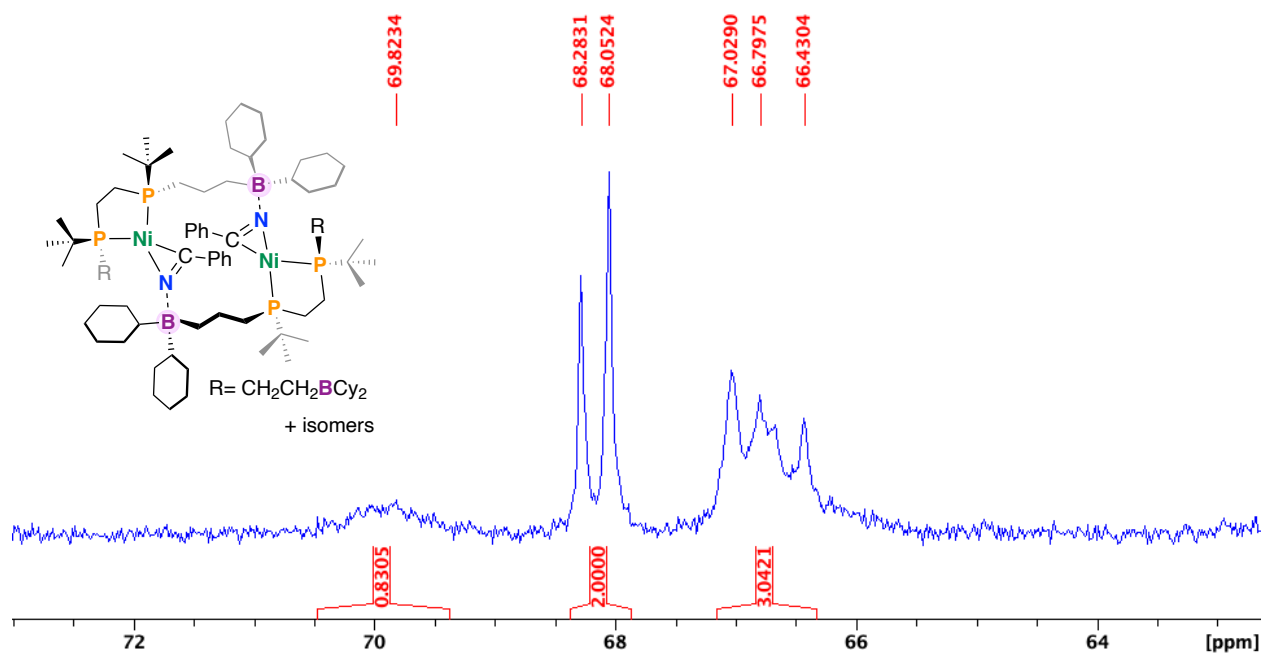

**Figure S11. 3**,  $^{11}\text{B}\{^1\text{H}\}$  NMR,  $\text{tol-d}_8$ , 96.3 MHz, 298 K, Inset collected at 160.5 MHz.

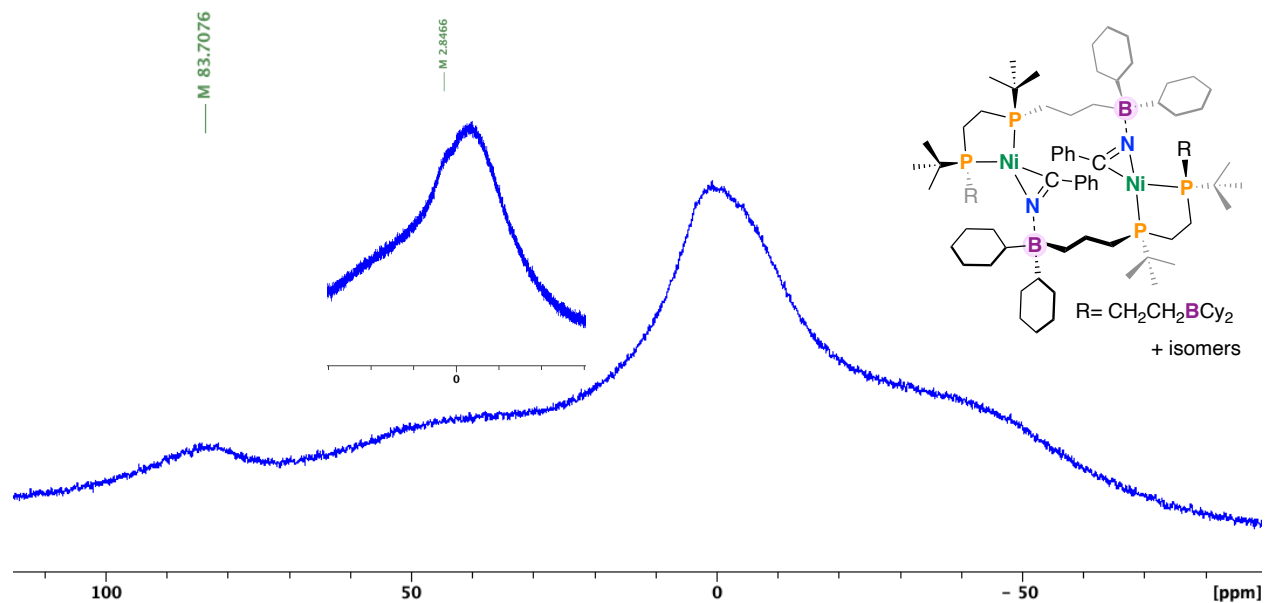

**Figure S12. 3**,  $^{13}\text{C}\{^1\text{H}\}$  NMR,  $\text{tol-d}_8$ , 125 MHz, 298 K.

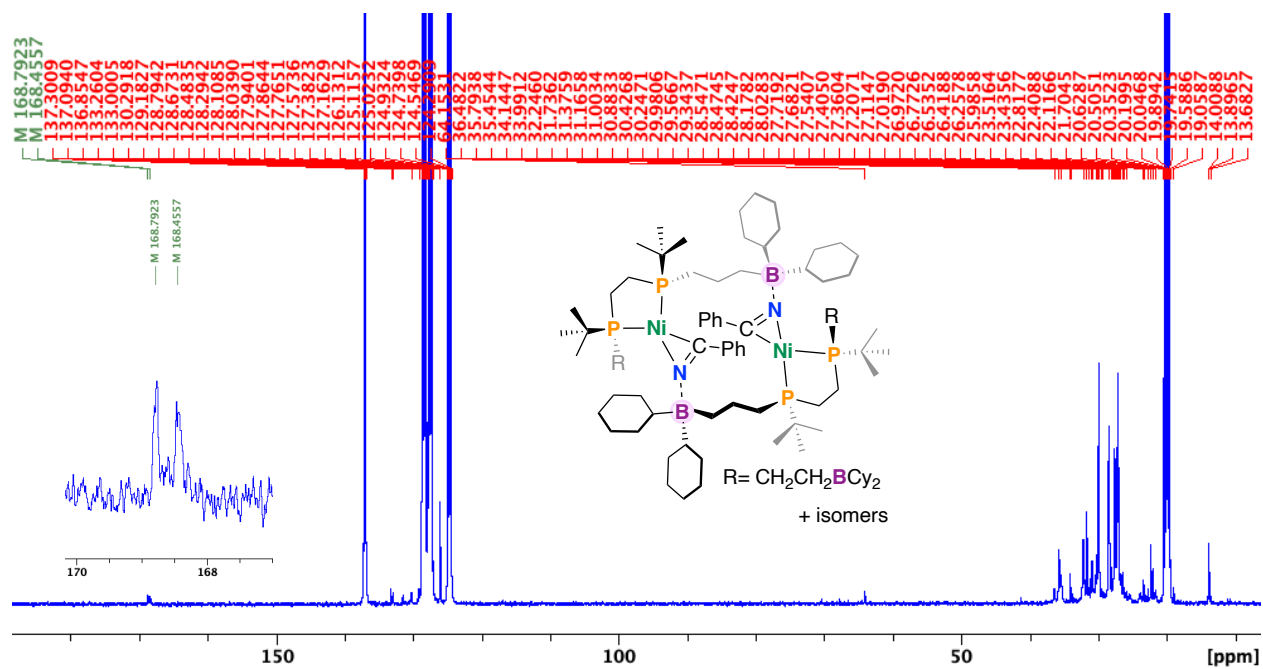

**[Ni(d<sup>t</sup>bbpe)(η<sup>2</sup>-PhCN)]<sub>2</sub>, 3**

IR Spectrum showing Absorbance versus Wavenumber (cm<sup>-1</sup>).

Legend:

- Free PhCN (Orange line)
- Complex 3 (Grey line)

Key peaks labeled:

- 2228 cm<sup>-1</sup> (C≡N)
- 1771 cm<sup>-1</sup> (C≡N)





Figure S17. 4,  $^{11}\text{B}\{^1\text{H}\}$  NMR,  $\text{tol-d}_8$ , 160.5 MHz, 298 K.

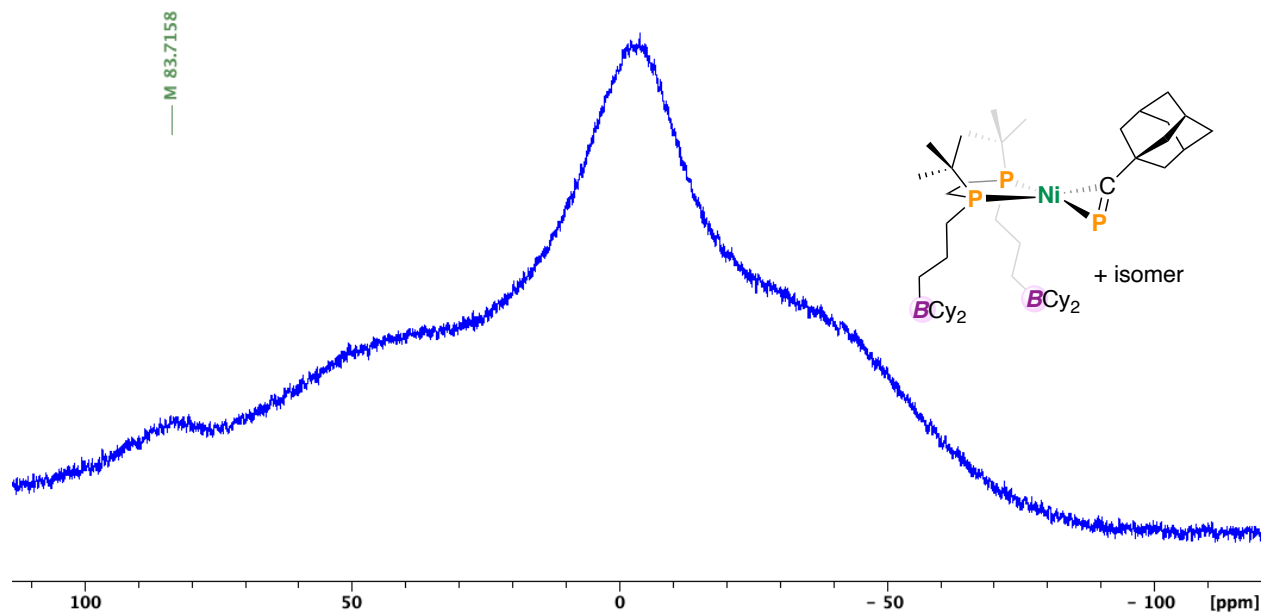

Figure S18. 4,  $^{13}\text{C}\{^1\text{H}\}$  NMR,  $\text{tol-d}_8$ , 125 MHz, 298 K.

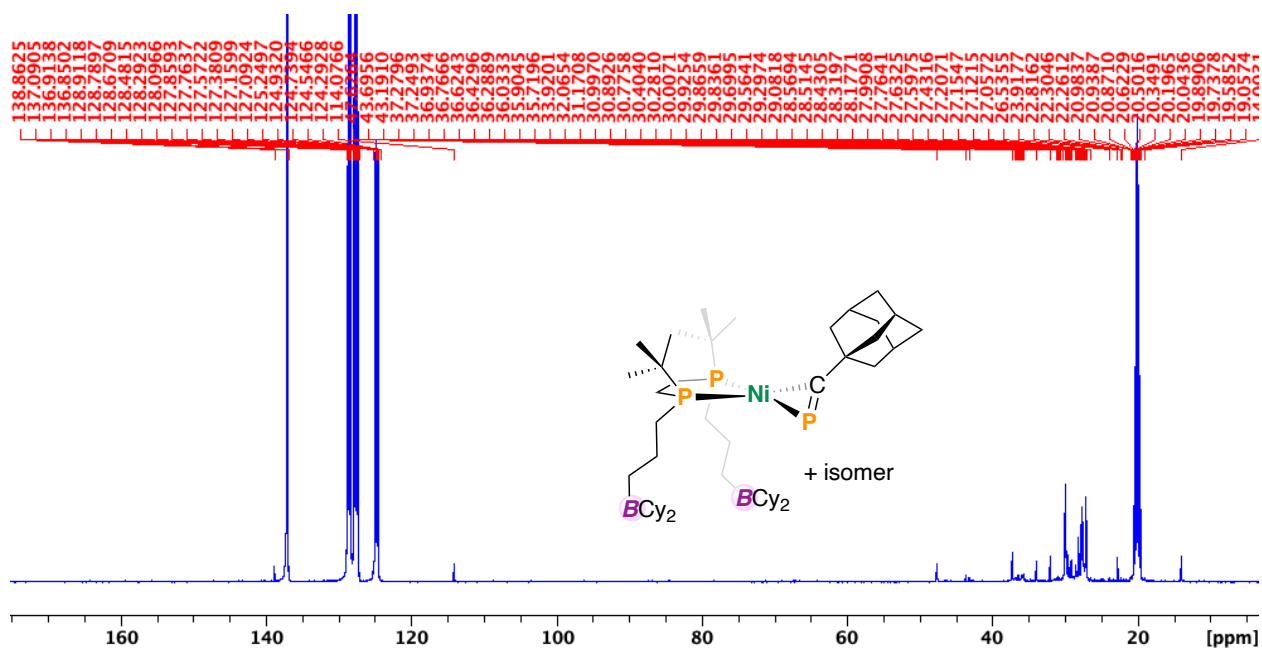

**Figure S19. 4,  $^1\text{H}$ - $^{13}\text{C}\{^1\text{H}\}$  HMBC NMR,  $\text{tol-d}_8$ , 125 MHz, 298 K.**

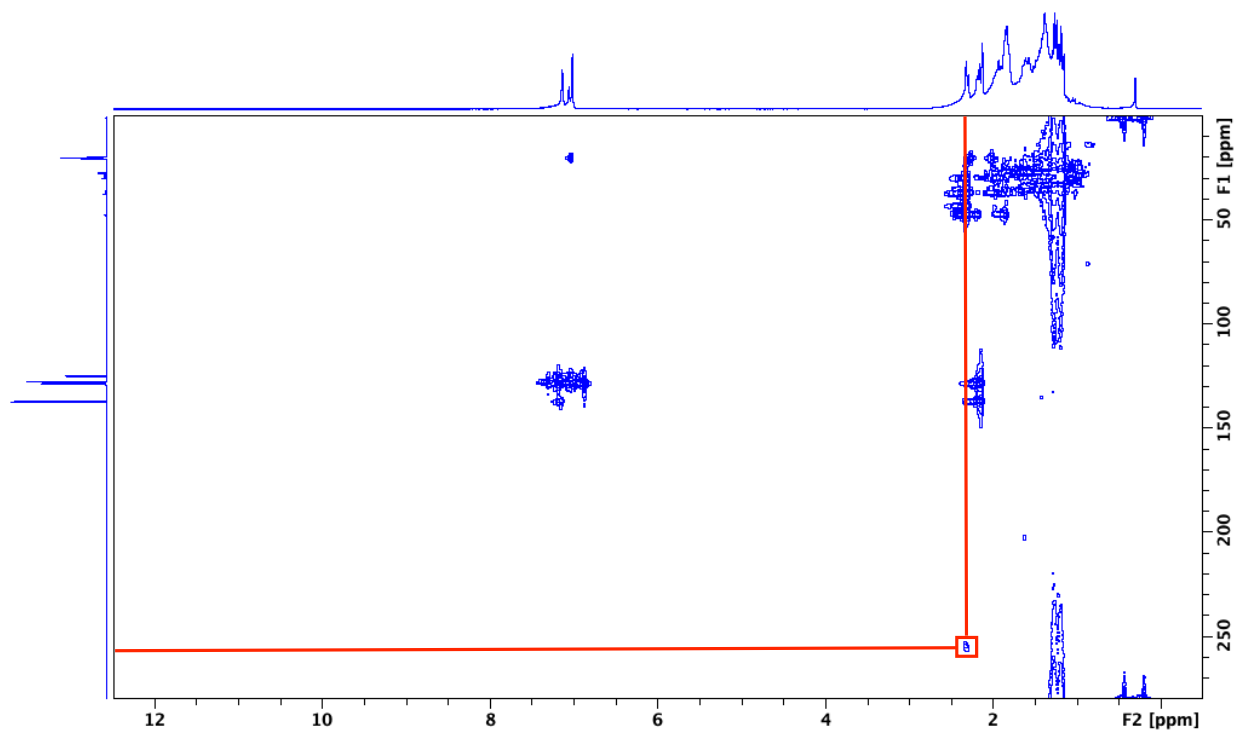

**Figure S20.** Reaction of **1** with 1-AdCN,  $^{31}\text{P}\{^1\text{H}\}$  NMR,  $\text{tol-d}_8$ , 202.5 MHz, 298 K.

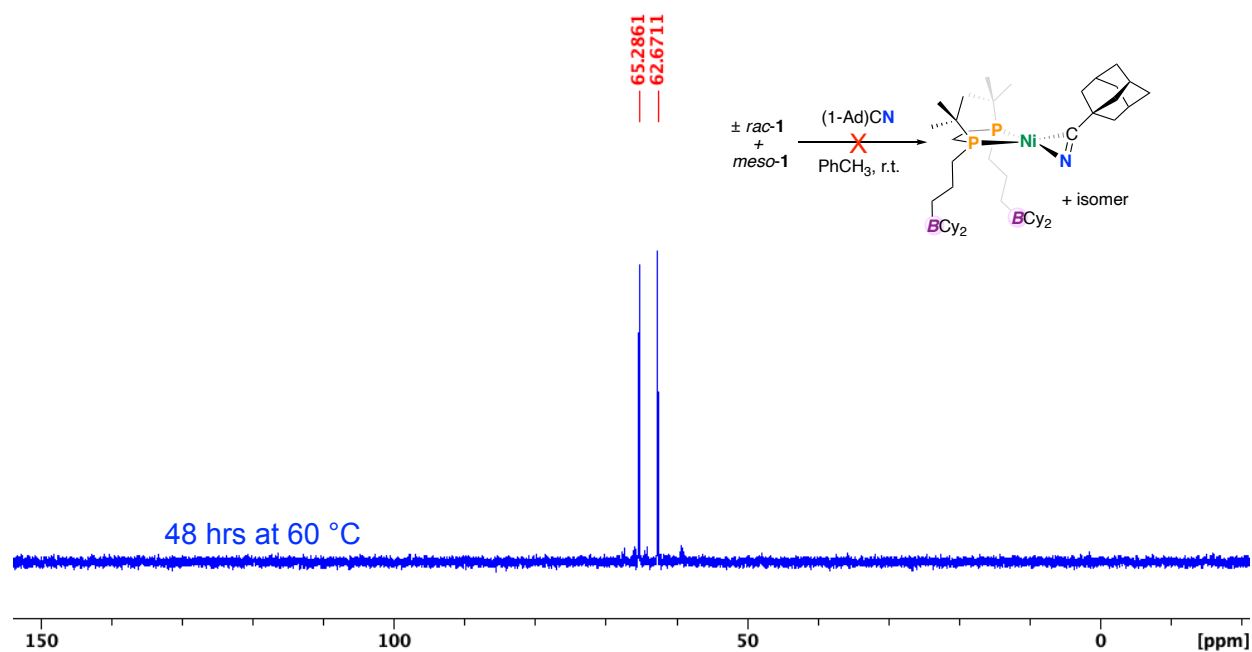

### Catalytic Hydroboration Details.

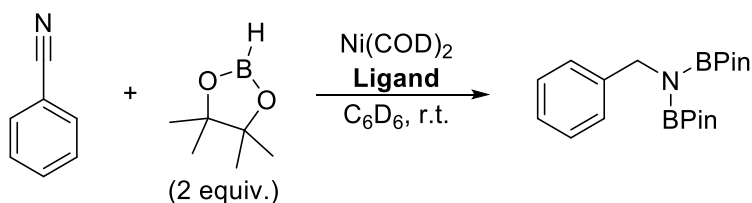

**Representative Catalytic Procedure:** To a J-Young NMR tube was added PhCN (0.014 g, 0.136 mmol), HBPin (0.044 g, 0.344 mmol), and HMDSO, as an internal standard, and dissolved in 0.4 mL  $\text{C}_6\text{D}_6$ . To the reaction mixture was added  $[\text{Ni}(\text{COD})_2]$  (0.004 g, 0.015 mmol) alongside  $t^t\text{bbpe}$  (0.010 g, 0.021 mmol). The reaction was monitored by  $^{11}\text{B}\{^1\text{H}\}$  and  $^1\text{H}$  NMR spectroscopy over 72 h.

**Table S1:** Reagent information for each catalytic run. %Yield determined by  $^1\text{H}$  NMR spectroscopy utilizing HMDSO as an internal standard after approximately 72 h. Ligand acronyms: 1,2-bis(ditertbutylphosphino)ethane ( $d^t\text{bpe}$ ), di-*tert*-butylboranyldiphosphinoethane ( $d^t\text{bbpe}$ ), and tri-*tert*-butylboranyldiphosphinoethane ( $t^t\text{bbpe}$ ).

| Run | PhCN (g) | HBPin (g) | $[\text{Ni}(\text{COD})_2]$ (g) | Ligand           | Ligand (g) | HMDSO (Amount)  | % Yield |
|-----|----------|-----------|---------------------------------|------------------|------------|-----------------|---------|
| 1   | 0.014    | 0.044     | 0.004                           | $t^t\text{bbpe}$ | 0.01       | 0.136 g         | 80      |
| 2   | 0.014    | 0.025     | 0.004                           | $d^t\text{bbpe}$ | 0.007      | 4 $\mu\text{L}$ | 40      |
|     |          |           |                                 |                  |            |                 |         |
| 3   | 0.017    | 0.062     | 0.004                           | $d^t\text{bpe}$  | 0.006      | 0.165 g         | 97      |
| 4   | 0.01     | 0.028     | 0.002                           | --               |            | 0.097           | 12      |
| 5   | 0.015    | 0.041     | --                              | $t^t\text{bbpe}$ | 0.004      | 4 $\mu\text{L}$ | 7       |

**Chart S1.** Comparison of Ni(0) catalysts featuring boron in the secondary coordination sphere for the hydroboration of PhCN using HBPin.

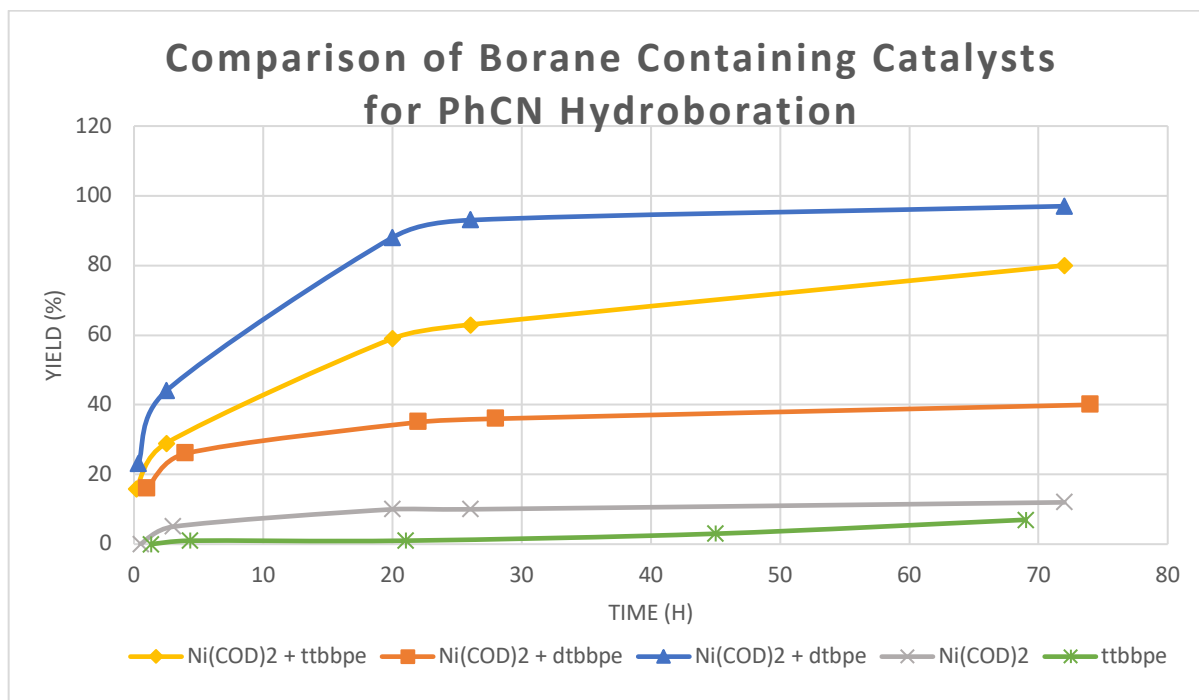

**Table S2.** Time and % Yield data for Chart 1. % Yield determined by <sup>1</sup>H NMR (C<sub>6</sub>D<sub>6</sub>, 500 MHz, 298K,) comparing to an internal HMDSO standard.

| Ni(COD) <sub>2</sub> + t <sup>t</sup> bbpe |       | Ni(COD) <sub>2</sub> + d <sup>t</sup> bbpe |       | Ni(COD) <sub>2</sub> + d <sup>t</sup> bpe |       | Ni(COD) <sub>2</sub> |       | t <sup>t</sup> bbpe |       |
|--------------------------------------------|-------|--------------------------------------------|-------|-------------------------------------------|-------|----------------------|-------|---------------------|-------|
| Time                                       | Yield | Time                                       | Yield | Time                                      | Yield | Time                 | Yield | Time                | Yield |
| 0.17                                       | 16    | 1                                          | 16    | 0.33                                      | 23    | 0.5                  | 0     | 1.33                | 0     |
| 2.5                                        | 29    | 4                                          | 26    | 2.5                                       | 44    | 3                    | 5     | 4.33                | 1     |
| 20                                         | 59    | 22                                         | 35    | 20                                        | 88    | 20                   | 10    | 21                  | 1     |
| 26                                         | 63    | 28                                         | 36    | 26                                        | 93    | 26                   | 10    | 45                  | 3     |
| 72                                         | 80    | 74                                         | 40    | 72                                        | 97    | 72                   | 12    | 69                  | 7     |

**Table S3.** TOF values.

| Entry                        | Ni(COD) <sub>2</sub> + t <sup>t</sup> bbpe | Ni(COD) <sub>2</sub> + d <sup>t</sup> bbpe | Ni(COD) <sub>2</sub> + d <sup>t</sup> bpe | Ni(COD) <sub>2</sub> | t <sup>t</sup> bbpe |
|------------------------------|--------------------------------------------|--------------------------------------------|-------------------------------------------|----------------------|---------------------|
| TOF final (h <sup>-1</sup> ) | 0.11                                       | 0.05                                       | 0.15                                      | 0.022                | 0.012               |

**Figure S21.** Hydroborylation of PhCN using *t*bbpe,  $^1\text{H}$  NMR ( $\text{C}_6\text{D}_6$ , 500 MHz, 298K). Product  $[\text{PhCH}_2\text{N}(\text{BPin})_2]$  aromatic ortho-hydrogen resonance is highlighted in black.

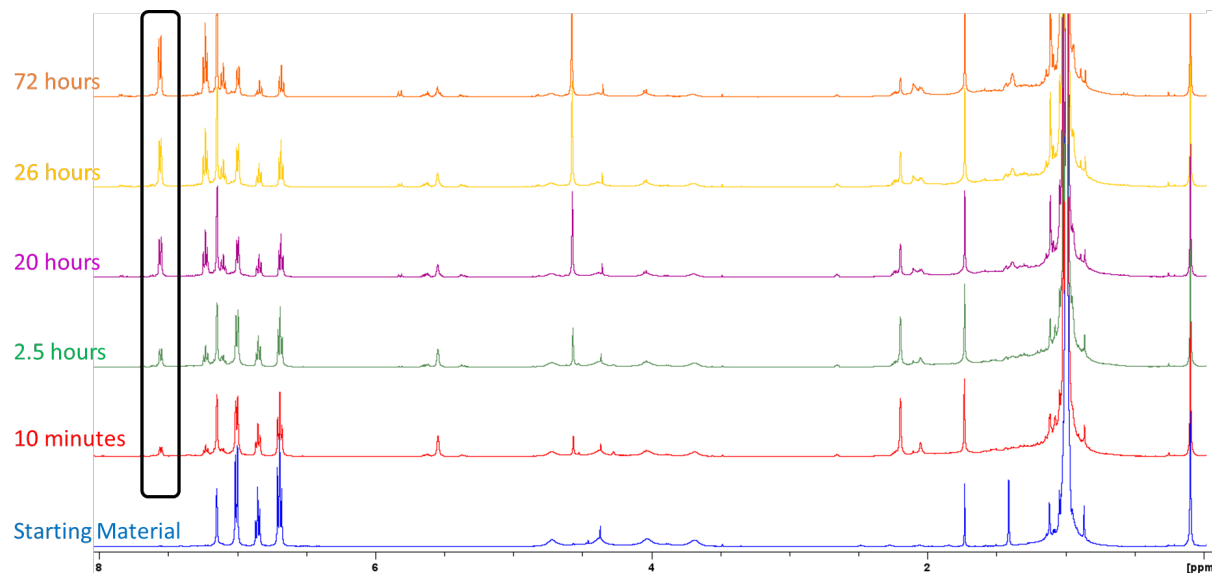

**Figure S22.** Hydroborylation of PhCN,  $^{11}\text{B}\{^1\text{H}\}$  NMR ( $\text{C}_6\text{D}_6$ , 161 MHz, 298K). Product  $[\text{PhCH}_2\text{N}(\text{BPin})_2]$  boron resonance is highlighted in black.

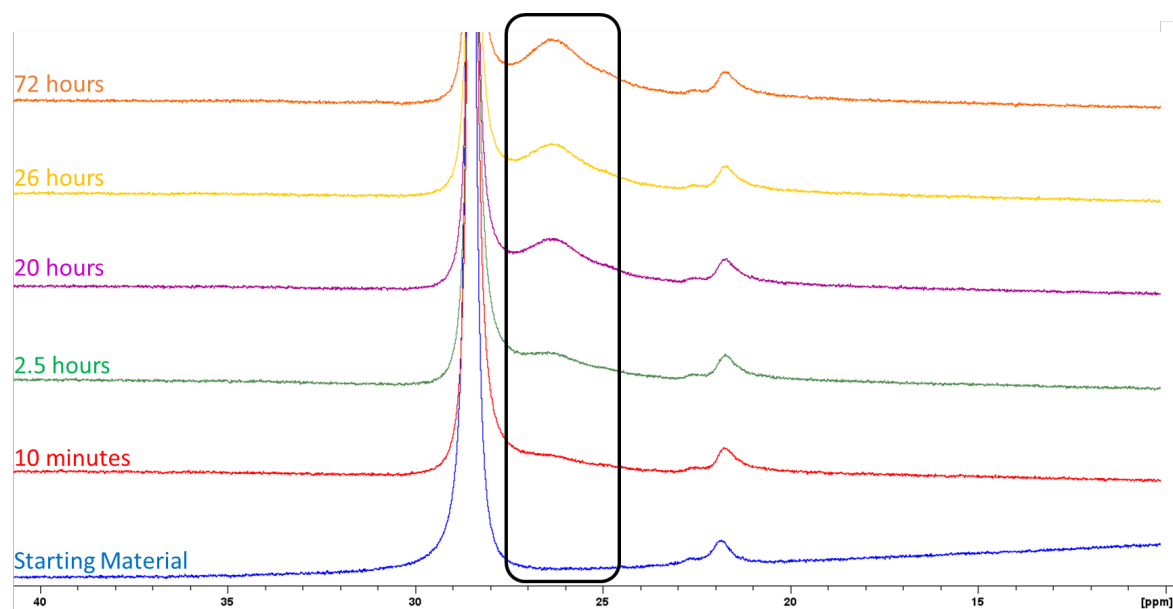

### Crystallographic details.

Single crystal X-ray diffraction (scXRD) data for *meso/meso-2* was collected using a Bruker D8 Venture diffractometer equipped with an Apex detector and I $\mu$ S Cu microsource at the University of Windsor. All crystals were mounted on a MiTeGen loop. Using Molybdenum K- $\alpha$  radiation ( $\lambda$  = 0.71 Å) at 170(2) K.

Cell refinement and data reduction were performed using Apex3.<sup>1</sup> An empirical absorption correction, based on the multiple measurements of equivalent reflections and merging of data was performed using SADABS.<sup>2</sup> Data conversion from XDS to SADABS file format was performed using XDS2SAD.<sup>3</sup> The space group was confirmed by XPREP.<sup>4</sup>

Routine checkCIF and structure factor analyses were performed using Platon.<sup>5</sup> CCDC **2251021** contains the supplementary crystallographic data for this paper. These data can be obtained free of charge from The Cambridge Crystallographic Data Centre via [www.ccdc.cam.ac.uk/data\\_request/cif](http://www.ccdc.cam.ac.uk/data_request/cif).

---

<sup>1</sup> Bruker (2016). APEX3, SAINT and SADABS. Bruker AXS Inc., Madison, Wisconsin, USA.

<sup>2</sup> L. Krause, R. Herbst-Irmer, G. M. Sheldrick, and D. Stalke, *J. Appl. Cryst.* **2015**, 48, 3-10.

<sup>3</sup> XDS2SAD, G. M. Sheldrick, 2008, University of Gottingen, Germany.

<sup>4</sup> a) XPREP, **2014**, Bruker AXS Inc., Madison, Wisconsin, USA. b) XPREP Version 2008, G. M. Sheldrick, 2008 Bruker AXS Inc., Madison, Wisconsin, USA.

<sup>5</sup> A. L. Spek, *Acta Cryst.* **2009**, D65, 148.

**Table S4.** Crystallographic data for *meso/meso-2*.

|                                                              |                                                                               |
|--------------------------------------------------------------|-------------------------------------------------------------------------------|
| Empirical formula                                            | C <sub>49</sub> H <sub>89</sub> B <sub>2</sub> NNiP <sub>2</sub>              |
| Formula weight                                               | 834.48                                                                        |
| Temperature/K                                                | 170.0                                                                         |
| Crystal system                                               | Triclinic                                                                     |
| Space group                                                  | <i>P</i> -1                                                                   |
| <i>a</i> /Å                                                  | 13.2771(17)                                                                   |
| <i>b</i> /Å                                                  | 13.8480(18)                                                                   |
| <i>c</i> /Å                                                  | 15.682(2)                                                                     |
| $\alpha$ /°                                                  | 67.397(5)                                                                     |
| $\beta$ /°                                                   | 68.276(5)                                                                     |
| $\gamma$ /°                                                  | 78.741(5)                                                                     |
| Volume/Å <sup>3</sup>                                        | 2468.0(6)                                                                     |
| <i>Z</i>                                                     | 2                                                                             |
| $\rho_{\text{calc}}$ /g/cm <sup>3</sup>                      | 1.123                                                                         |
| $\mu$ /mm <sup>-1</sup>                                      | 0.490                                                                         |
| <i>F</i> (000)                                               | 916.0                                                                         |
| Crystal size/mm <sup>3</sup>                                 | 0.1 × 0.08 × 0.05                                                             |
| Radiation                                                    | MoK $\alpha$ ( $\lambda$ = 0.71073)                                           |
| 2 $\Theta$ range for data collection/°                       | 3.97 to 56.8                                                                  |
| Index ranges                                                 | -17 ≤ <i>h</i> ≤ 17, -18 ≤ <i>k</i> ≤ 18, -20 ≤ <i>l</i> ≤ 20                 |
| Reflections collected                                        | 159104                                                                        |
| Independent reflections                                      | 12337 [ <i>R</i> <sub>int</sub> = 0.0511, <i>R</i> <sub>sigma</sub> = 0.0231] |
| Data/restraints/parameters                                   | 12337/0/504                                                                   |
| Goodness-of-fit on <i>F</i> <sup>2</sup>                     | 1.110                                                                         |
| Final <i>R</i> indexes [ <i>I</i> ≥ 2 $\sigma$ ( <i>I</i> )] | <i>R</i> <sub>1</sub> = 0.0419, <i>wR</i> <sub>2</sub> = 0.1124               |
| Final <i>R</i> indexes [all data]                            | <i>R</i> <sub>1</sub> = 0.0534, <i>wR</i> <sub>2</sub> = 0.1260               |
| Largest diff. peak/hole / e Å <sup>-3</sup>                  | 1.03/-0.45                                                                    |

$$R_1 = \sum ||F_o| - |F_c|| / \sum |F_o|; wR_2 = [\sum (w(F_o^2 - F_c^2)^2) / \sum w(F_o^2)^2]^{1/2}$$



## Computational Details.

All calculations were performed using version 4.2.1 of the ORCA computational package<sup>6</sup> and were run on the Graham cluster maintained by Compute Canada. All geometry optimizations and frequency calculations were performed at the BP86-D3(BJ)/def2-TZVP<sup>7</sup> level of theory. The RI approximation was used to enhance computational efficiency, along with the auxiliary basis *def2/J*<sup>8</sup>. Convergence criteria were met using *Grid4* and *FinalGrid6* integral grid sizes. Frequency calculations (*NumFreq*) were performed to confirm that each optimized geometry was a true minimum indicated by the absence of imaginary frequencies. Single-point calculations were performed at the BP86-D3(BJ)/def2-TZVP level of theory on optimized geometries using a Universal Solvation Model (SMD) to obtain thermochemical values in solvent. The solvent applied for all complexes was "TOLUENE".

Accurate electronic energies were determined using the "gold-standard" of quantum chemistry (CCSD(T)) at the DLPNO-CCSD(T)/def2-TZVP<sup>9</sup> level of theory. The RIJCOSX approximation was used to enhance computational efficiency, along with a *def2/J*<sup>9</sup> auxiliary basis set. As well, a *def2-TZVP/C*<sup>10</sup> auxiliary basis set was used.

To obtain accurate thermochemical information, the final Gibbs free energies for each chemical species were calculated using the following equation.

$$\Delta G_{\text{soln}} = E_{\text{el}}(\text{DLPNO-CCSD(T)}) + \Delta G_{\text{correction}}(\text{DFT}) + \Delta G^{\circ}_{\text{soln}}(\text{DFT})$$

$E_{\text{el}}(\text{DLPNO-CCSD(T)})$  is the final electronic energy from a DLPNO-CCSD(T)/def2-TZVP calculation,  $\Delta G_{\text{correction}}(\text{DFT})$  is the  $G-E_{\text{el}}$  (Gibbs free energy minus the electronic energy) from a BP86-D3(BJ)/def2-TZVP calculation, and  $\Delta G^{\circ}_{\text{soln}}(\text{DFT})$  is the sum of  $\Delta G_{\text{ENP}}(\text{CPCM Dielectric})$  and  $\Delta G_{\text{CDS}}(\text{Free-energy}(\text{cav}+\text{disp}))$  from an SMD single point calculation.

---

<sup>6</sup> F. Neese, "Software update: the ORCA program system, version 4.0" *WIREs Comput. Mol. Sci.* 2017, e1327. DOI: 10.1002/wcms.1327

<sup>7</sup> a) S. Grimme, S. Ehrlich, L. Goerigk, *J. Comput. Chem.* 2011, **32**, 1456; b) S. Grimme, J. Antony, S. Ehrlich, H. Krieg, *J. Chem. Phys.* 2010, **132**, 154104; c) F. Weigend, R. Ahlrichs, *Phys. Chem. Chem. Phys.* 2005, **7**, 3297.

<sup>8</sup> F. Weigend, *Phys. Chem. Chem. Phys.* 2006, **8**, 1057.

<sup>9</sup> a) C. Riplinger, P. Pinski, U. Becker, E.F. Valeev, F. Neese, *J. Chem. Phys.* 2016, **144**, 024109; b) C. Riplinger, B. Sandhoefer, A. Hansen, F. Neese, *J. Chem. Phys.* 2013, **139**, 134101; c) C. Riplinger, F. Neese, *J. Chem. Phys.* 2013, **138**, 034106.

<sup>10</sup> A. Hellweg, C. Hattig, S. Hofener, W. Klopper, *Theor. Chim. Acta* 1990, **77**, 123.

Figure S23. Potential Energy Surface scan (PES) for complex 4\_intra

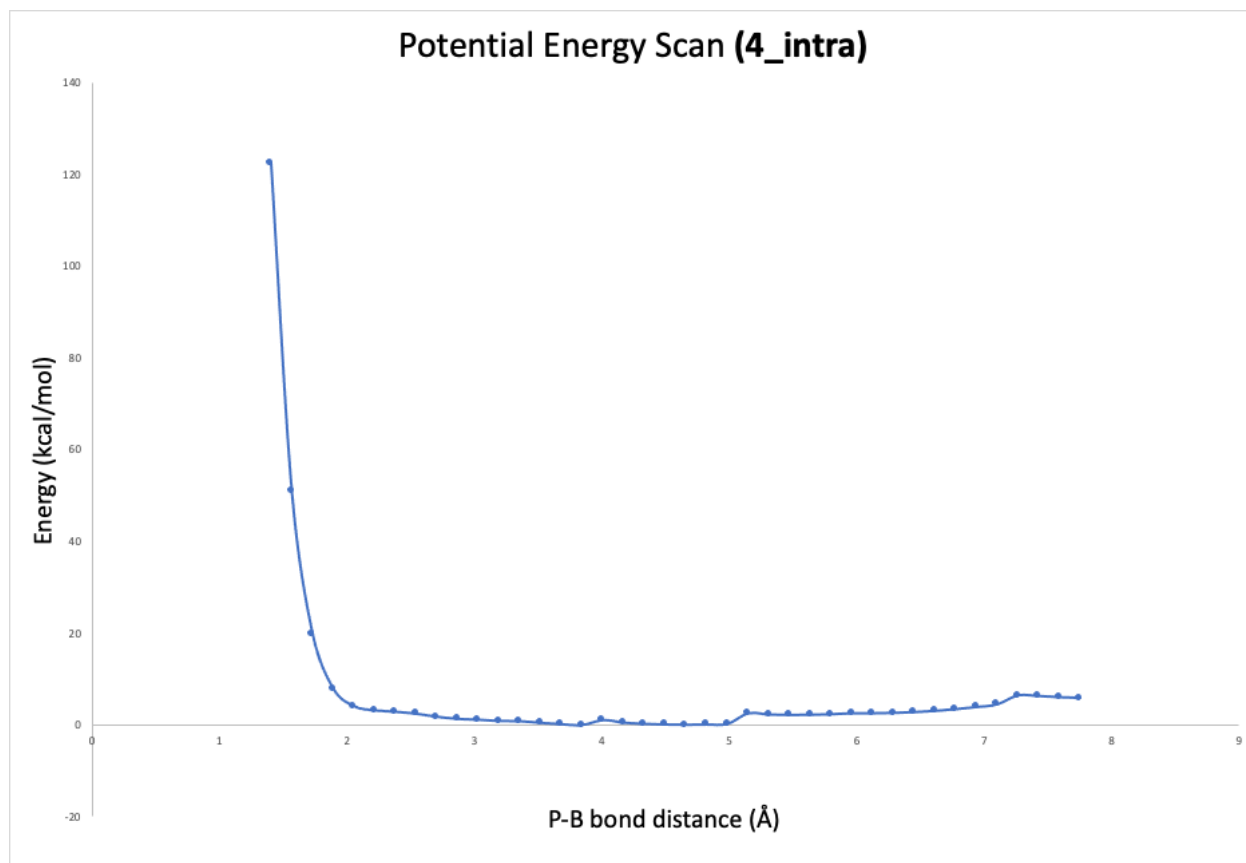

Supplement: d3ra02797j1.pdf [file d3ra02797j1.pdf]
